# Supplementary material for: A Phylogenomic Census of Molecular Functions Identifies Modern Thermophilic Archaea as the Most Ancient Form of Cellular Life
Source: Hindawi journal article supplement (doi:10.1155/2014/706468), 2014-01-01
Supplement: f1 [file 706468.f1.pdf]

SUPPLEMENTARY TABLE 1. Scientific names of free-living organisms sampled in this study along with taxonomic classification and GO coverage.

| #  | Organism                                      | Taxonomy                         | Superkingdom | GO coverage (%) |
|----|-----------------------------------------------|----------------------------------|--------------|-----------------|
| 1  | <i>Aeropyrum pernix K1</i>                    | Crenarchaeota-Desulfurococcales  | Archaea      | 56              |
| 2  | <i>Sulfolobus solfataricus P2</i>             | Crenarchaeota- Sulfolobales      | Archaea      | 52              |
| 3  | <i>Sulfolobus acidocaldarius DSM 639</i>      | Crenarchaeota-Sulfolobales       | Archaea      | 54              |
| 4  | <i>Thermofilum pendens Hrk 5</i>              | Crenarchaeota-Thermoproteales    | Archaea      | 53              |
| 5  | <i>Pyrobaculum islandicum DSM 4184</i>        | Crenarchaeota- Thermoproteales   | Archaea      | 52              |
| 6  | <i>Caldivirga maquilingensis IC-167</i>       | Crenarchaeota- Thermoproteales   | Archaea      | 58              |
| 7  | <i>Metallosphaera sedula DSM 5348</i>         | Crenarchaeota- Sulfolobales      | Archaea      | 55              |
| 8  | <i>Staphylothermus marinus F1</i>             | Crenarchaeota- Desulfurococcales | Archaea      | 55              |
| 9  | <i>Pyrobaculum calidifontis JCM 11548</i>     | Crenarchaeota- Thermoproteales   | Archaea      | 52              |
| 10 | <i>Hyperthermus butylicus DSM 5456</i>        | Crenarchaeota- Desulfurococcales | Archaea      | 54              |
| 11 | <i>Sulfolobus islandicus L.S.2.15</i>         | Crenarchaeota- Sulfolobales      | Archaea      | 54              |
| 12 | <i>Thermoproteus neutrophilus V24Sta</i>      | Crenarchaeota- Thermoproteales   | Archaea      | 51              |
| 13 | <i>Desulfurococcus kamchatkensis 1221n</i>    | Crenarchaeota- Desulfurococcales | Archaea      | 55              |
| 14 | <i>Methanosphaerula palustris E1-9c</i>       | Euryarchaeota- Methanomicrobia   | Archaea      | 57              |
| 15 | <i>Archaeoglobus fulgidus DSM 4304</i>        | Euryarchaeota-Archaeoglobi       | Archaea      | 56              |
| 16 | <i>Natronomonas pharaonis DSM 2160</i>        | Euryarchaeota-Halobacteria       | Archaea      | 52              |
| 17 | <i>Haloquadratum walsbyi DSM 16790</i>        | Euryarchaeota-Halobacteria       | Archaea      | 51              |
| 18 | <i>Halobacterium salinarum R1</i>             | Euryarchaeota-Halobacteria       | Archaea      | 51              |
| 19 | <i>Methanobacterium thermoautotrophicum</i>   | Euryarchaeota-Methanobacteria    | Archaea      | 58              |
| 20 | <i>Methanosphaera stadtmanae DSM 3091</i>     | Euryarchaeota-Methanobacteria    | Archaea      | 61              |
| 21 | <i>Methanobrevibacter smithii PS</i>          | Euryarchaeota-Methanobacteria    | Archaea      | 59              |
| 22 | <i>Methanocaldococcus jannaschii DSM 2661</i> | Euryarchaeota-Methanococci       | Archaea      | 58              |
| 23 | <i>Methanococcus vanniellii SB</i>            | Euryarchaeota-Methanococci       | Archaea      | 63              |
| 24 | <i>Methanococcus aeolicus Nankai-3</i>        | Euryarchaeota-Methanococci       | Archaea      | 65              |
| 25 | <i>Methanococcus maripaludis C7</i>           | Euryarchaeota-Methanococci       | Archaea      | 61              |
| 26 | <i>Methanosarcina mazei Go1</i>               | Euryarchaeota-Methanomicrobia    | Archaea      | 53              |
| 27 | <i>Methanococcoides burtonii DSM 6242</i>     | Euryarchaeota-Methanomicrobia    | Archaea      | 58              |
| 28 | <i>Methanosarcina barkeri</i>                 | Euryarchaeota-Methanomicrobia    | Archaea      | 52              |
| 29 | <i>Methanospirillum hungatei JF-1</i>         | Euryarchaeota-Methanomicrobia    | Archaea      | 57              |
| 30 | <i>Methanosaeta thermophila PT</i>            | Euryarchaeota-Methanomicrobia    | Archaea      | 62              |
| 31 | <i>Methanoculleus marisnigri JRI</i>          | Euryarchaeota-Methanomicrobia    | Archaea      | 56              |
| 32 | <i>Methanocorpusculum labreanum Z</i>         | Euryarchaeota-Methanomicrobia    | Archaea      | 61              |
| 33 | <i>Methanoregula boonei 6A8</i>               | Euryarchaeota-Methanomicrobia    | Archaea      | 58              |
| 34 | <i>Methanopyrus kandleri AV19</i>             | Euryarchaeota-Methanopyri        | Archaea      | 56              |
| 35 | <i>Pyrococcus kodakaraensis KOD1</i>          | Euryarchaeota-Thermococci        | Archaea      | 52              |
| 36 | <i>Pyrococcus furiosus</i>                    | Euryarchaeota-Thermococci        | Archaea      | 58              |
| 37 | <i>Pyrococcus abyssi Orsay</i>                | Euryarchaeota-Thermococci        | Archaea      | 63              |
| 38 | <i>Thermococcus onnurineus NA1</i>            | Euryarchaeota-Thermococci        | Archaea      | 59              |

|    |                                               |                              |          |    |
|----|-----------------------------------------------|------------------------------|----------|----|
| 39 | <i>Thermococcus gammatolerans</i> EJ3         | Euryarchaeota-Thermococci    | Archaea  | 56 |
| 40 | <i>Thermococcus sibiricus</i> MM 739          | Euryarchaeota-Thermococci    | Archaea  | 57 |
| 41 | <i>Picrophilus torridus</i> DSM 9790          | Euryarchaeota-Thermoplasmata | Archaea  | 66 |
| 42 | <i>Thermoplasma acidophilum</i> DSM 1728      | Euryarchaeota-Thermoplasmata | Archaea  | 61 |
| 43 | <i>Thermoplasma volcanium</i> GSS1            | Euryarchaeota-Thermoplasmata | Archaea  | 60 |
| 44 | <i>Korarchaeum cryptofilum</i> OPF8           | Korarchaeota                 | Archaea  | 61 |
| 45 | <i>Nitrosopumilus maritimus</i> SCM1          | Thaumarchaeota               | Archaea  | 53 |
| 46 | <i>Acidobacteria bacterium</i>                | Acidobacteria                | Bacteria | 54 |
| 47 | <i>Solibacter usitatus</i> Ellin6076          | Acidobacteria                | Bacteria | 54 |
| 48 | <i>Acidobacterium capsulatum</i> ATCC 51196   | Acidobacteria                | Bacteria | 57 |
| 49 | <i>Nocardioides</i> sp.                       | Actinobacteria               | Bacteria | 60 |
| 50 | <i>Corynebacterium efficiens</i> TS-314       | Actinobacteria               | Bacteria | 56 |
| 51 | <i>Streptomyces avermitilis</i> MA-4680       | Actinobacteria               | Bacteria | 57 |
| 52 | <i>Rhodococcus erythropolis</i> PR4           | Actinobacteria               | Bacteria | 59 |
| 53 | <i>Mycobacterium avium</i> 104                | Actinobacteria               | Bacteria | 59 |
| 54 | <i>Nocardia farcinica</i> IFM 10152           | Actinobacteria               | Bacteria | 54 |
| 55 | <i>Rubrobacter xylanophilus</i> DSM 9941      | Actinobacteria               | Bacteria | 68 |
| 56 | <i>Kineococcus radiotolerans</i> SRS30216     | Actinobacteria               | Bacteria | 57 |
| 57 | <i>Thermobifida fusca</i> YX                  | Actinobacteria               | Bacteria | 60 |
| 58 | <i>Arthrobacter aurescens</i> TC1             | Actinobacteria               | Bacteria | 61 |
| 59 | <i>Acidothermus cellulolyticus</i> 11B        | Actinobacteria               | Bacteria | 65 |
| 60 | <i>Kocuria rhizophila</i>                     | Actinobacteria               | Bacteria | 65 |
| 61 | <i>Salinispora arenicola</i> CNS-205          | Actinobacteria               | Bacteria | 58 |
| 62 | <i>Saccharopolyspora erythraea</i> NRRL 2338  | Actinobacteria               | Bacteria | 61 |
| 63 | <i>Micrococcus luteus</i> NCTC 2665           | Actinobacteria               | Bacteria | 64 |
| 64 | <i>Beutenbergia cavernae</i> DSM 12333        | Actinobacteria               | Bacteria | 64 |
| 65 | <i>Gordonia bronchialis</i> DSM 43247         | Actinobacteria               | Bacteria | 55 |
| 66 | <i>Persephonella marina</i> L2TR              | Aquificae                    | Bacteria | 59 |
| 67 | <i>Sulfurihydrogenibium azorense</i> Az-Fu1   | Aquificae                    | Bacteria | 64 |
| 68 | <i>Aquifex aeolicus</i> VF5                   | Aquificae                    | Bacteria | 67 |
| 69 | <i>Cytophaga hutchinsonii</i> ATCC 33406      | Bacteroidetes                | Bacteria | 50 |
| 70 | <i>Salinibacter ruber</i> DSM 13855           | Bacteroidetes                | Bacteria | 59 |
| 71 | <i>Flavobacterium johnsoniae</i>              | Bacteroidetes                | Bacteria | 52 |
| 72 | <i>Gramella forsetii</i> KT0803               | Bacteroidetes                | Bacteria | 52 |
| 73 | <i>Pedobacter heparinus</i> DSM 2366          | Bacteroidetes                | Bacteria | 52 |
| 74 | <i>Flavobacteriaceae bacterium</i> 3519-10    | Bacteroidetes                | Bacteria | 50 |
| 75 | <i>Chlorobium limicola</i> DSM 245            | Chlorobi                     | Bacteria | 60 |
| 76 | <i>Prosthecochloris aestuarii</i> DSM 271     | Chlorobi                     | Bacteria | 61 |
| 77 | <i>Pelodictyon luteolum</i> DSM 273           | Chlorobi                     | Bacteria | 65 |
| 78 | <i>Chlorobaculum parvum thiosulfatophilum</i> | Chlorobi                     | Bacteria | 64 |
| 79 | <i>Chloroherpeton thalassium</i>              | Chlorobi                     | Bacteria | 60 |
| 80 | <i>Thermomicrobium roseum</i> DSM 5159        | Chloroflexi                  | Bacteria | 56 |

|     |                                                       |                     |          |    |
|-----|-------------------------------------------------------|---------------------|----------|----|
| 81  | <i>Herpetosiphon aurantiacus</i> ATCC 23779           | Chloroflexi         | Bacteria | 55 |
| 82  | <i>Chloroflexus aurantiacus</i> ATCC 29366            | Chloroflexi         | Bacteria | 62 |
| 83  | <i>Roseiflexus castenholzii</i> DSM 13941             | Chloroflexi         | Bacteria | 59 |
| 84  | <i>Synechococcus elongatus</i> PCC 7942               | Cyanobacteria       | Bacteria | 57 |
| 85  | <i>Synechocystis</i> sp.                              | Cyanobacteria       | Bacteria | 52 |
| 86  | <i>Prochlorococcus marinus</i> MIT 9211               | Cyanobacteria       | Bacteria | 57 |
| 87  | <i>Trichodesmium erythraeum</i> ISM101                | Cyanobacteria       | Bacteria | 51 |
| 88  | <i>Anabaena variabilis</i> ATCC 29413                 | Cyanobacteria       | Bacteria | 52 |
| 89  | <i>Cyanothece</i> sp. PCC 7425                        | Cyanobacteria       | Bacteria | 50 |
| 90  | <i>Deinococcus radiodurans</i> R1                     | Deinococcus-Thermus | Bacteria | 54 |
| 91  | <i>Thermus aquaticus</i> Y51MC23                      | Deinococcus-Thermus | Bacteria | 56 |
| 92  | <i>Dictyoglomus thermophilum</i> H-6-12               | Dictyoglomi         | Bacteria | 66 |
| 93  | <i>Leuconostoc mesenteroides</i> ATCC 8293            | Firmicutes          | Bacteria | 65 |
| 94  | <i>Oenococcus oeni</i> PSU-1                          | Firmicutes          | Bacteria | 66 |
| 95  | <i>Oceanobacillus iheyensis</i> HTE831                | Firmicutes          | Bacteria | 61 |
| 96  | <i>Bacillus subtilis</i>                              | Firmicutes          | Bacteria | 60 |
| 97  | <i>Geobacillus kaustophilus</i> HTA426                | Firmicutes          | Bacteria | 57 |
| 98  | <i>Carboxydotherrmus hydrogenoformans</i> Z-2901      | Firmicutes          | Bacteria | 57 |
| 99  | <i>Exiguobacterium sibiricum</i> 255-15               | Firmicutes          | Bacteria | 61 |
| 100 | <i>Streptococcus thermophilus</i> ATCC BAA-250        | Firmicutes          | Bacteria | 63 |
| 101 | <i>Moorella thermoacetica</i> ATCC 39073              | Firmicutes          | Bacteria | 63 |
| 102 | <i>Clostridium acetobutylicum</i> ATCC 824            | Firmicutes          | Bacteria | 59 |
| 103 | <i>Desulfotobacterium hafniense</i> DCB-2             | Firmicutes          | Bacteria | 58 |
| 104 | <i>Lactococcus lactis</i> SK11                        | Firmicutes          | Bacteria | 61 |
| 105 | <i>Listeria innocua</i> Clip11262                     | Firmicutes          | Bacteria | 60 |
| 106 | <i>Pediococcus pentosaceus</i> ATCC 25745             | Firmicutes          | Bacteria | 65 |
| 107 | <i>Alkaliphilus metalliredigens</i> QYMF              | Firmicutes          | Bacteria | 56 |
| 108 | <i>Coprothermobacter proteolyticus</i> DSM 5265       | Firmicutes          | Bacteria | 64 |
| 109 | <i>Syntrophomonas wolfei</i>                          | Firmicutes          | Bacteria | 59 |
| 110 | <i>Thermoanaerobacter pseudethanolicus</i> ATCC 33223 | Firmicutes          | Bacteria | 65 |
| 111 | <i>Desulfotomaculum reducens</i> MI-1                 | Firmicutes          | Bacteria | 60 |
| 112 | <i>Caldicellulosiruptor saccharolyticus</i> DSM 8903  | Firmicutes          | Bacteria | 61 |
| 113 | <i>Brevibacillus brevis</i> NBRC 100599               | Firmicutes          | Bacteria | 55 |
| 114 | <i>Haloferoxylum orenii</i> H 168                     | Firmicutes          | Bacteria | 65 |
| 115 | <i>Lactobacillus delbrueckii</i> ATCC 11842           | Firmicutes          | Bacteria | 62 |
| 116 | <i>Staphylococcus carnosus</i>                        | Firmicutes          | Bacteria | 64 |
| 117 | <i>Natranaerobius thermophilus</i> JW/NM-WN-LF        | Firmicutes          | Bacteria | 60 |
| 118 | <i>Macrococcus caseolyticus</i> JCSC5402              | Firmicutes          | Bacteria | 64 |
| 119 | <i>Blautia hydrogenotrophica</i> DSM 10507            | Firmicutes          | Bacteria | 52 |
| 120 | <i>Desulforudis audaxviator</i> MP104C                | Firmicutes          | Bacteria | 60 |
| 121 | <i>Anoxybacillus flavithermus</i> WK1                 | Firmicutes          | Bacteria | 61 |

|     |                                                   |                      |          |    |
|-----|---------------------------------------------------|----------------------|----------|----|
| 122 | <i>Heliobacterium modesticaldum</i> Ice1          | Firmicutes           | Bacteria | 54 |
| 123 | <i>Eubacterium bifforme</i> DSM 3989              | Firmicutes           | Bacteria | 51 |
| 124 | <i>Anaerocellum thermophilum</i> DSM 6725         | Firmicutes           | Bacteria | 56 |
| 125 | <i>Anaerococcus hydrogenalis</i> DSM 7454         | Firmicutes           | Bacteria | 57 |
| 126 | <i>Gemmatimonas aurantiaca</i>                    | Gemmatimonadetes     | Bacteria | 55 |
| 127 | <i>Thermodesulfovibrio yellowstonii</i> DSM 11347 | Nitrospirae          | Bacteria | 65 |
| 128 | <i>Xanthobacter autotrophicus</i> Py2             | Proteobacteria-Alpha | Bacteria | 60 |
| 129 | <i>Hyphomonas neptunium</i> ATCC 15444            | Proteobacteria-Alpha | Bacteria | 60 |
| 130 | <i>Silicibacter pomeroyi</i> DSS-3                | Proteobacteria-Alpha | Bacteria | 63 |
| 131 | <i>Rhodospseudomonas palustris</i> ATCC BAA-98    | Proteobacteria-Alpha | Bacteria | 62 |
| 132 | <i>Zymomonas mobilis</i>                          | Proteobacteria-Alpha | Bacteria | 58 |
| 133 | <i>Rhodospirillum rubrum</i> ATCC 11170           | Proteobacteria-Alpha | Bacteria | 64 |
| 134 | <i>Novosphingobium aromaticivorans</i> DSM 12444  | Proteobacteria-Alpha | Bacteria | 62 |
| 135 | <i>Jannaschia</i> sp.                             | Proteobacteria-Alpha | Bacteria | 58 |
| 136 | <i>Gluconobacter oxydans</i> 621H                 | Proteobacteria-Alpha | Bacteria | 60 |
| 137 | <i>Erythrobacter litoralis</i> HTCC2584           | Proteobacteria-Alpha | Bacteria | 55 |
| 138 | <i>Sphingopyxis alaskensis</i> RB2256             | Proteobacteria-Alpha | Bacteria | 61 |
| 139 | <i>Paracoccus denitrificans</i> PD1222            | Proteobacteria-Alpha | Bacteria | 61 |
| 140 | <i>Nitrobacter winogradskyi</i> Nb-255            | Proteobacteria-Alpha | Bacteria | 56 |
| 141 | <i>Pelagibacter ubique</i> HTCC1062               | Proteobacteria-Alpha | Bacteria | 71 |
| 142 | <i>Rhodoferax ferrireducens</i> T118              | Proteobacteria-Alpha | Bacteria | 63 |
| 143 | <i>Magnetospirillum magneticum</i> AMB-1          | Proteobacteria-Alpha | Bacteria | 56 |
| 144 | <i>Rhodobacter sphaeroides</i> ATCC 17029         | Proteobacteria-Alpha | Bacteria | 62 |
| 145 | <i>Acidiphilium cryptum</i> JF-5                  | Proteobacteria-Alpha | Bacteria | 65 |
| 146 | <i>Roseobacter denitrificans</i> OCh 114          | Proteobacteria-Alpha | Bacteria | 59 |
| 147 | <i>Granulibacter bethesdensis</i> CGDNIH1         | Proteobacteria-Alpha | Bacteria | 66 |
| 148 | <i>Sphingomonas wittichii</i> RW1                 | Proteobacteria-Alpha | Bacteria | 65 |
| 149 | <i>Maricaulis maris</i> MCS10                     | Proteobacteria-Alpha | Bacteria | 59 |
| 150 | <i>Beijerinckia indica</i>                        | Proteobacteria-Alpha | Bacteria | 60 |
| 151 | <i>Methylocella silvestris</i> BL2                | Proteobacteria-Alpha | Bacteria | 58 |
| 152 | <i>Dinoroseobacter shibae</i> DFL 12              | Proteobacteria-Alpha | Bacteria | 60 |
| 153 | <i>Parvibaculum lavamentivorans</i> DS-1          | Proteobacteria-Alpha | Bacteria | 62 |
| 154 | <i>Ochrobactrum anthropi</i> ATCC 49188           | Proteobacteria-Alpha | Bacteria | 62 |
| 155 | <i>Methylobacterium chloromethanicum</i> CM4      | Proteobacteria-Alpha | Bacteria | 53 |
| 156 | <i>Oligotropha carboxidovorans</i> OM5            | Proteobacteria-Alpha | Bacteria | 53 |
| 157 | <i>Caulobacter crescentus</i> NA1000              | Proteobacteria-Alpha | Bacteria | 61 |
| 158 | <i>Hirschia baltica</i> ATCC 49814                | Proteobacteria-Alpha | Bacteria | 57 |
| 159 | <i>Dechloromonas aromatica</i> RCB                | Proteobacteria-Beta  | Bacteria | 60 |
| 160 | <i>Hermiimonas arsenicoxydans</i>                 | Proteobacteria-Beta  | Bacteria | 59 |
| 161 | <i>Burkholderia cepacia</i> J2315                 | Proteobacteria-Beta  | Bacteria | 62 |
| 162 | <i>Nitrosomonas europaea</i> ATCC 19718           | Proteobacteria-Beta  | Bacteria | 62 |
| 163 | <i>Acidovorax</i> sp.                             | Proteobacteria-Beta  | Bacteria | 59 |

|     |                                               |                        |          |    |
|-----|-----------------------------------------------|------------------------|----------|----|
| 164 | <i>Chromobacterium violaceum</i> ATCC 12472   | Proteobacteria-Beta    | Bacteria | 58 |
| 165 | <i>Methylobacillus flagellatus</i> KT         | Proteobacteria-Beta    | Bacteria | 63 |
| 166 | <i>Thiobacillus denitrificans</i> ATCC 25259  | Proteobacteria-Beta    | Bacteria | 60 |
| 167 | <i>Polynucleobacter</i> sp.                   | Proteobacteria-Beta    | Bacteria | 65 |
| 168 | <i>Nitrospira multififormis</i> ATCC 25196    | Proteobacteria-Beta    | Bacteria | 60 |
| 169 | <i>Polaromonas naphthalenivorans</i> CJ2      | Proteobacteria-Beta    | Bacteria | 56 |
| 170 | <i>Janthinobacterium</i> sp.                  | Proteobacteria-Beta    | Bacteria | 61 |
| 171 | <i>Ralstonia eutropha</i> ATCC 17699          | Proteobacteria-Beta    | Bacteria | 66 |
| 172 | <i>Leptothrix cholodnii</i> SP-6              | Proteobacteria-Beta    | Bacteria | 63 |
| 173 | <i>Delftia acidovorans</i> SPH-1              | Proteobacteria-Beta    | Bacteria | 59 |
| 174 | <i>Methylibium petroleiphilum</i> PM1         | Proteobacteria-Beta    | Bacteria | 57 |
| 175 | <i>Variovorax paradoxus</i> S110              | Proteobacteria-Beta    | Bacteria | 62 |
| 176 | <i>Methylotenera mobilis</i> JLW8             | Proteobacteria-Beta    | Bacteria | 62 |
| 177 | <i>Syntrophus aciditrophicus</i> SB           | Proteobacteria-Delta   | Bacteria | 55 |
| 178 | <i>Desulfococcus oleovorans</i> Hxd3          | Proteobacteria-Delta   | Bacteria | 59 |
| 179 | <i>Desulfobacterium autotrophicum</i> HRM2    | Proteobacteria-Delta   | Bacteria | 61 |
| 180 | <i>Desulfotalea psychrophila</i> LSv54        | Proteobacteria-Delta   | Bacteria | 54 |
| 181 | <i>Geobacter metallireducens</i> GS-15        | Proteobacteria-Delta   | Bacteria | 63 |
| 182 | <i>Anaeromyxobacter dehalogenans</i> 2CP-C    | Proteobacteria-Delta   | Bacteria | 59 |
| 183 | <i>Syntrophobacter fumaroxidans</i> MPOB      | Proteobacteria-Delta   | Bacteria | 58 |
| 184 | <i>Pelobacter carbinolicus</i> DSM 2380       | Proteobacteria-Delta   | Bacteria | 60 |
| 185 | <i>Desulfatibacillum alkenivorans</i> AK-01   | Proteobacteria-Delta   | Bacteria | 58 |
| 186 | <i>Haliangium ochraceum</i> DSM 14365         | Proteobacteria-Delta   | Bacteria | 50 |
| 187 | <i>Desulfovibrio desulfuricans</i> ATCC 27774 | Proteobacteria-Delta   | Bacteria | 63 |
| 188 | <i>Sulfurimonas denitrificans</i> ATCC 33889  | Proteobacteria-Epsilon | Bacteria | 64 |
| 189 | <i>Arcobacter butzleri</i> RM4018             | Proteobacteria-Epsilon | Bacteria | 62 |
| 190 | <i>Nitratiruptor</i> sp.                      | Proteobacteria-Epsilon | Bacteria | 65 |
| 191 | <i>Sulfurovum</i> sp.                         | Proteobacteria-Epsilon | Bacteria | 58 |
| 192 | <i>Colwellia psychrerythraea</i> 34H          | Proteobacteria-Gamma   | Bacteria | 53 |
| 193 | <i>Alkalilimnicola ehrlichei</i> MLHE-1       | Proteobacteria-Gamma   | Bacteria | 63 |
| 194 | <i>Saccharophagus degradans</i> ATCC 204508   | Proteobacteria-Gamma   | Bacteria | 57 |
| 195 | <i>Pseudomonas aeruginosa</i> LMG 12228       | Proteobacteria-Gamma   | Bacteria | 63 |
| 196 | <i>Methylococcus capsulatus</i>               | Proteobacteria-Gamma   | Bacteria | 60 |
| 197 | <i>Psychrobacter arcticus</i> 273-4           | Proteobacteria-Gamma   | Bacteria | 63 |
| 198 | <i>Idiomarina loihiensis</i> ATCC 15444       | Proteobacteria-Gamma   | Bacteria | 66 |
| 199 | <i>Citrobacter koseri</i> ATCC BAA-895        | Proteobacteria-Gamma   | Bacteria | 55 |
| 200 | <i>Enterobacter sakazakii</i> ATCC BAA-894    | Proteobacteria-Gamma   | Bacteria | 55 |
| 201 | <i>Chromohalobacter salexigens</i> DSM 3043   | Proteobacteria-Gamma   | Bacteria | 66 |
| 202 | <i>Alteromonas macleodii</i>                  | Proteobacteria-Gamma   | Bacteria | 56 |
| 203 | <i>Thiomicrospira crunogena</i> XCL-2         | Proteobacteria-Gamma   | Bacteria | 64 |
| 204 | <i>Shewanella putrefaciens</i> CN-32          | Proteobacteria-Gamma   | Bacteria | 60 |

|     |                                                   |                      |          |    |
|-----|---------------------------------------------------|----------------------|----------|----|
| 205 | <i>Azotobacter vinelandii</i> DJ                  | Proteobacteria-Gamma | Bacteria | 57 |
| 206 | <i>Nitrosococcus oceani</i> ATCC 19707            | Proteobacteria-Gamma | Bacteria | 58 |
| 207 | <i>Pseudoalteromonas haloplanktis</i> TAC125      | Proteobacteria-Gamma | Bacteria | 59 |
| 208 | <i>Halorhodospira halophila</i> SL1               | Proteobacteria-Gamma | Bacteria | 66 |
| 209 | <i>Hahella chejuensis</i> KCTC 2396               | Proteobacteria-Gamma | Bacteria | 50 |
| 210 | <i>Marinobacter aquaeolei</i> VT8                 | Proteobacteria-Gamma | Bacteria | 59 |
| 211 | <i>Psychromonas ingrahamii</i> 37                 | Proteobacteria-Gamma | Bacteria | 62 |
| 212 | <i>Acidithiobacillus ferrooxidans</i> ATCC 53993  | Proteobacteria-Gamma | Bacteria | 59 |
| 213 | <i>Aeromonas hydrophila</i>                       | Proteobacteria-Gamma | Bacteria | 65 |
| 214 | <i>Alcanivorax borkumensis</i> SK2                | Proteobacteria-Gamma | Bacteria | 64 |
| 215 | <i>Marinomonas</i> sp.                            | Proteobacteria-Gamma | Bacteria | 65 |
| 216 | <i>Acinetobacter baumannii</i> AB307-0294         | Proteobacteria-Gamma | Bacteria | 59 |
| 217 | <i>Vibrio cholerae</i> MJ-1236                    | Proteobacteria-Gamma | Bacteria | 63 |
| 218 | <i>Tolomonas auensis</i> DSM 9187                 | Proteobacteria-Gamma | Bacteria | 66 |
| 219 | <i>Leptospira biflexa</i> Ames                    | Spirochaetes         | Bacteria | 54 |
| 220 | <i>Dethiosulfovibrio peptidovorans</i> DSM 11002  | Synergistetes        | Bacteria | 62 |
| 221 | <i>Thermanaerovibrio acidaminovorans</i> DSM 6589 | Synergistetes        | Bacteria | 69 |
| 222 | <i>Thermotoga maritima</i> MSB8                   | Thermotogae          | Bacteria | 65 |
| 223 | <i>Fervidobacterium nodosum</i> UW101             | Thermotogae          | Bacteria | 66 |
| 224 | <i>Petrotoga mobilis</i> SJ95                     | Thermotogae          | Bacteria | 69 |
| 225 | <i>Thermosipho africanus</i> TCF52B               | Thermotogae          | Bacteria | 62 |
| 226 | <i>Kosmotoga olearia</i> TBF 19.5.1               | Thermotogae          | Bacteria | 65 |
| 227 | <i>Opitutus terrae</i> PB90-1                     | Verrucomicrobia      | Bacteria | 56 |
| 228 | <i>Methylacidiphilum infernorum</i> V4            | Verrucomicrobia      | Bacteria | 52 |
| 229 | <i>Aedes aegypti</i>                              | Arthropoda           | Eukarya  | 56 |
| 230 | <i>Drosophila melanogaster</i>                    | Arthropoda           | Eukarya  | 65 |
| 231 | <i>Anopheles gambiae</i>                          | Arthropoda           | Eukarya  | 55 |
| 232 | <i>Gallus gallus</i>                              | Chordata-Birds       | Eukarya  | 78 |
| 233 | <i>Danio rerio</i>                                | Chordata-Fish        | Eukarya  | 64 |
| 234 | <i>Bos taurus</i>                                 | Chordata-Mammals     | Eukarya  | 71 |
| 235 | <i>Mus musculus</i>                               | Chordata-Mammals     | Eukarya  | 67 |
| 236 | <i>Rattus norvegicus</i>                          | Chordata-Mammals     | Eukarya  | 78 |
| 237 | <i>Homo sapiens</i>                               | Chordata-Primates    | Eukarya  | 62 |
| 238 | <i>Saccharomyces cerevisiae</i> ATCC 204508       | Fungi-Ascomycota     | Eukarya  | 82 |
| 239 | <i>Emericella nidulans</i>                        | Fungi-Ascomycota     | Eukarya  | 53 |
| 240 | <i>Kluyveromyces lactis</i>                       | Fungi-Ascomycota     | Eukarya  | 54 |
| 241 | <i>Yarrowia lipolytica</i>                        | Fungi-Ascomycota     | Eukarya  | 51 |
| 242 | <i>Debaryomyces hansenii</i>                      | Fungi-Ascomycota     | Eukarya  | 51 |
| 243 | <i>Candida glabrata</i>                           | Fungi-Ascomycota     | Eukarya  | 53 |
| 244 | <i>Pichia stipitis</i>                            | Fungi-Ascomycota     | Eukarya  | 55 |
| 245 | <i>Aspergillus fumigatus</i> FGSC A1100           | Fungi-Ascomycota     | Eukarya  | 54 |
| 246 | <i>Vanderwaltozyma polyspora</i> DSM              | Fungi-Ascomycota     | Eukarya  | 52 |

70294

|     |                                      |                     |         |    |
|-----|--------------------------------------|---------------------|---------|----|
| 247 | <i>Cryptococcus neoformans JEC21</i> | Fungi-Basidiomycota | Eukarya | 52 |
| 248 | <i>Arabidopsis thaliana</i>          | Plants-Streptophyta | Eukarya | 51 |
| 249 | <i>Vitis vinifera</i>                | Plants-Streptophyta | Eukarya | 53 |

---
